# Supplementary material
Source: PubMed Central journal article supplement (PMC2238640)
Supplement: NIHMS38425-supplement-Suppl__fig__1.pdf [file NIHMS38425-supplement-Suppl__fig__1.pdf]

**A.**

Helix-1

|                |     | <b>B</b>                 | <b>B</b>                |
|----------------|-----|--------------------------|-------------------------|
| PXR_human      | 141 | QGLTEEQRMMIRELMDAQMKTFD  | TTFSHFKNFRLPGVLSSGCELPE |
| PXR_chimpanzee |     | QGLTEEQRMMIRELMDAQMKTFD  | TTFSHFKNFRLPGVLSSGCELPE |
| PXR_rhesus     |     | QGLTEEQRMMIRELMDAQMKTFD  | TTFSHFKNFRLPGVLSSGCEMPE |
| PXR_dog        |     | KGLSEEQQTMIRELMDAQMKTFD  | TTFSNFKDFRLPAACSSGREVP  |
| PXR_pig        |     | KGLTEEQRMTISELMNAQMKTFD  | TTTFHFKNFRLPEVLSSSLEI   |
| PXR_rabbit     |     | QGLTGEQRMIIEELMDAQMKTFD  | TTFSHFKNFRLPEVLGSGCEI   |
| PXR_mouse      |     | QGLTEEQQALIQELMDAQMQTFD  | TTFSHFKNFRLPAVFHSGCELPE |
| PXR_rat        |     | QGLTEEQQALIQELMDAQMQTFD  | TTFSHFKNFRLPAVFHSDCELPE |
| PXR_chicken    |     | GGLTAEQQELISILIAAHKRTFD  | SSFSQFQHYQPAVRLC----    |
| BXR-alpha      |     | ASLTPEQQHFLTQLVGAHTKTFD  | FNFTFSKNFRPIRRSSDPTQEP  |
| BXR-beta       |     | ASLTPEQQHFITELVEAHTKTFD  | FNFTFFKNFRPIRRSPDPTQDP  |
| PXR_zebrafish  |     | VTLTPQQEAVIQELLNAHKKTFD  | MTCAHFSQFRPLDRDQKSVSE   |
| PXR_fugu       |     | IHLSSQQEETIRELLYGHRKTFD  | LEFYRFSSFRVRTSTTLFDL    |
| VDR_human      | 122 | PKLSEEQQRIIAILLDAHKKTYD  | PTYSDFCQFRPPVRVNDGGG    |
| VDR_tamarin    |     | PKLSEEQQRIIAILLDAHKKTYD  | PTYSDFCQFRPPVRVNDGGG    |
| VDR_mouse      |     | PKLSEEQQHIIAILLDAHKKTYD  | PTYADFRDFRPPPIRADVST    |
| VDR_rat        |     | PKLSEEQQHIIAILLDAHKKTYD  | PTYADFRDFRPPVMDGSTG     |
| VDR_quail      |     | PKLSEEQQKVINILLEAHHKTFD  | TTYSDFNKFRPPVRSKFSST    |
| VDR_chicken    |     | PKLSEEQQKVIDTLLEAHHKTFD  | TTYSDFNKFRPPVRSKFSST    |
| VDR_xenopus    |     | PKISDEQQKMIDILLEAHRKTFD  | TTYSDFNKFRPPVRENVDP     |
| VDR_zebrafish  |     | PRLSDEQMQUIINSLVEAHHKTYD | DSYSDFVRFPPVREGPVRTS    |
| VDR_halibut    |     | PRLNEEQARMISSLVEAHHKTYD  | SYSDFSRFRPPVREGPVRTS    |
| VDR_fugu       |     | PRLTDEQSQVIATLVEAHHKTYD  | ESYSDFRFRPPVREGPVRTS    |
| VDR_lamprey    |     | PQLLEEQERLIATLIEAHRKTYD  | SYSDFSQFRPPKRGDGSPEC    |

|                |     | # #*                           | Helix-3                      | <b>B</b>                                                  |
|----------------|-----|--------------------------------|------------------------------|-----------------------------------------------------------|
|                |     |                                | * * #*                       | #                                                         |
| PXR_human      | 199 | WSQVRKDLCSLKVSLQL-RGEDG        | SVWNYKPP-----ADSGGKE         | IFSL <b>LLPHMADMSTYMF</b> K                               |
| PXR_chimpanzee |     | WSQVRKDLCSLKVSLQL-RGEDG        | SVWNYKPP-----ADNGGKE         | IFSL <b>LLPHMADMSTYMF</b> K                               |
| PXR_rhesus     |     | WNQVRKDLWSVKVSVQL-RGEDG        | SVWNYKPP-----ADNGGKE         | IFSL <b>LLPHMADMSTYMF</b> K                               |
| PXR_dog        |     | WSQVREDLCSLKVCLRL-RGEDG        | SVQNYTPQ-----ADRSGAE         | IFSL <b>LLPHMADMSTYMF</b> K                               |
| PXR_pig        |     | WSKLRDLCSVKLSLQL-RGEDG         | SVWNYKPP-----ADNSGKE         | IFSL <b>LLPHIADMSTYMF</b> K                               |
| PXR_rabbit     |     | WRQIQEELGTMKLSLQL-RGEDG        | SVWNYTPP-----ADRSGK          | KL <b>FLSLLPHLADMSTYMF</b> K                              |
| PXR_mouse      |     | WSQIMKDRVPMKISLQL-RGEDG        | SIWNYQPP-----SKSDGKE         | II <b>PLPHLADVSTYMF</b> K                                 |
| PXR_rat        |     | WSQIMKDSVPMKISVQL-RGEDG        | SIWNYQPP-----SKSDGKE         | II <b>PLPHLADVSTYMF</b> K                                 |
| PXR_chicken    |     | SASLSPQLDCLDEDVL-----          | -----PDVFSILPHFADL           | ST <b>FM</b> IQ                                           |
| BXR-alpha      |     | -----                          | -----SSEAF                   | L <b>MLPHISDLV</b> TYMIK                                  |
| BXR-beta       |     | -----                          | -----SSEAF                   | L <b>MLPHISDLF</b> TYMLK                                  |
| PXR_zebrafish  |     | IAEDPMQWVFNPTSLS-SSSSY         | QSLDNKEK-----KHF             | SGN-F <b>SSLPHFTDL</b> TTYMIK                             |
| PXR_fugu       |     | SSPSGPASSDV--SSL- <b>T</b> SAR | L <b>RGRPETPQTQ</b> GGENARRG | -V <b>TALPHV</b> TDLATCMIH                                |
| VDR_human      | 181 | DSSSSCDHCITSSDM-MDSSSF         | SNLDLSEEDSDDP                | SVTL <b>ELSQLSMLPHL</b> ADLVSYIQ                          |
| VDR_tamarin    |     | DSSSSCDHYITSPDM-MDSSSF         | SNLDLSEEDSDDP                | SVTL <b>ELSQLSMLPHL</b> ADLVSYIQ                          |
| VDR_mouse      |     | DSSSNS-DLYTPSLDM-MEPAS         | FSTMDLNEEGSDDP               | SVTL <b>DLSP</b> SMLPHLADLVSYIQ                           |
| VDR_rat        |     | NSSSSSDLYTTSMD-MEP             | SGFSNLDLNGEDSDDP             | SVTL <b>DLSP</b> SMLPHLADLVSYIQ                           |
| VDR_quail      |     | DSNDVFGSDAFGAFPEP              | MQMFSNLDLSEESDE              | SPSMN <b>IELPHL</b> PMLPHLADLVSYIQ                        |
| VDR_chicken    |     | DSNDVFGSDAFGAFPEP              | MQMFSNLDLSEESDE              | SPSMN <b>IELPHL</b> PMLPHLADLVSYIQ                        |
| VDR_xenopus    |     | DSDVFTSSPDSSEHGFFS             | ASLFGQFEYSSMG                | GSGELS-----ML <b>PHIAD</b> LVSYIQ                         |
| VDR_zebrafish  |     | DSFNHSPESVDTKLNFS              | NLLMMYQDSG-SPDS              | SEED <b>QQS</b> ----RL <b>SMLPHL</b> ADLVSYIQ             |
| VDR_halibut    |     | DSFNHSPESVDTKMNF               | SNLLMMYQDGASS                | SPDSSEEN-----TK <b>L</b> SML <b>PHL</b> ADLVSYIQ          |
| VDR_fugu       |     | DSFHSHPESVDNKLNF               | NLLMMYHEQGSS                 | PESSEEEA-----SS <b>F</b> S <b>M</b> L <b>PHL</b> ADLVSYIQ |
| VDR_lamprey    |     | MD-----                        | -----ELPKASASG               | AEAAAGDELS <b>M</b> L <b>PHL</b> ADLVSYIQ                 |

|                | Helix-3 | Helix-4                       | Helix-5          |                               |
|----------------|---------|-------------------------------|------------------|-------------------------------|
|                |         |                               | <b>B B</b>       |                               |
|                |         |                               | <b># #* * B</b>  | <b>*</b>                      |
|                |         | <b>B</b>                      |                  |                               |
| PXR_human      | 253     | GIISFAKVISYFRDLPIEDQISLLKGA   | <b>FELCQLRF</b>  | NTVFNAETGTWECGR--LSY---C      |
| PXR_chimpanzee |         | GIINFAKVISYFRDLPIEDQIALLKGA   | <b>FELCQLRF</b>  | NTVFNAETGTWECGR--LSY---C      |
| PXR_rhesus     |         | GIINFAKVISYFRDLPIEDQISLLKGA   | <b>FELCQLRF</b>  | NTVFNAETGTWECGR--LSY---C      |
| PXR_dog        |         | GVINFAKVISYFRDLPIEDQISLLKGA   | <b>FELCQLRF</b>  | NTVFNAETGTWECGR--LSY---C      |
| PXR_pig        |         | GIINFAKVISYFRDLPIEDQISLLKGA   | <b>FELCQLRF</b>  | NTVFNAETGTWECGR--LSY---S      |
| PXR_rabbit     |         | GIINFAKVISYFRDLPIEDQISLLKGA   | <b>FELCQLRF</b>  | NTVFNAETGTWECGR--LSY---C      |
| PXR_mouse      |         | GVINFAKVISYFRDLPIEDQISLLKGA   | <b>FELCQLRF</b>  | NTVFNAETGTWECGR--LAY---C      |
| PXR_rat        |         | GVINFAKVISYFRDLPIEDQISLLKGA   | <b>FELCQLRF</b>  | NTVFNAETGTWECGR--LAY---C      |
| PXR_chicken    |         | QVIKFAKEIPAFRGLPIDDQISLLKGA   | <b>TFLGICQIQ</b> | FNTVFNEETNAWECGQ--HCF---T     |
| BXR-alpha      |         | GIISFAKMLPYFKSLDIEDQIALLKGS   | <b>VAEVS</b>     | VIRFNTVFNPDNTWECGP--FTY---D   |
| BXR-beta       |         | GVISFAKMLPYFRSLAIEDQIALLKGS   | <b>VLEV</b>      | CVIRFNRMFNPKTNTWECGA--FTY---N |
| PXR_zebrafish  |         | NVINFGKTLTMFRALVMEDQISLLKGA   | <b>TFEI</b>      | ILIHFNMFNEVTGIWECGP--LQY---C  |
| PXR_fugu       |         | DIIAFSKSLTDFKSLDIGDQIALLKGA   | <b>TFEV</b>      | MEIRFNMVFNTKTGLWECGH--ATY---C |
| VDR_human      | 240     | KVIGFAKMI PGFRDLTSEDQIVLLKSSA | <b>IEVIM</b>     | LRSNESFTMDDMSWTCGNQDYKY---R   |
| VDR_tamarin    |         | KVIGFAKMI PGFRDLTSEDQIVLLKSSA | <b>IEVIM</b>     | LRSNESFTMDDMSWTCGNPDYKY---R   |
| VDR_mouse      |         | KVIGFAKMI PGFRDLTSDQIVLLKSSA  | <b>IEVIM</b>     | LRSNQSFMTDDMSWDCGSQDYKY---D   |
| VDR_rat        |         | KVIGFAKMI PGFRDLTSDQIVLLKSSA  | <b>IEVIM</b>     | LRSNQSFMTDDMSWDCGSQDYKY---D   |
| VDR_quail      |         | KVIGFAKMI PGFRDLTAEDQIALLKSSA | <b>IEVIM</b>     | LRSNQSFMTMEDMSWTCGSNDFKYKVS   |
| VDR_chicken    |         | KVIGFAKMI PGFRDLTAEDQIALLKSSA | <b>IEVIM</b>     | LRSNQSFMTMEDMSWTCGSNDFKYKVS   |
| VDR_xenopus    |         | KIIGFAKMI PGFRDLIAEDQIALLKSSV | <b>IEVIM</b>     | LRSNQSFSLDDMSWTCGSEDFKYKVDD   |
| VDR_zebrafish  |         | KVIGFAKMI PGFRDLTAEDQIALLKSSA | <b>IEI</b>       | IMLRNQSFSLEDMSWSCGGPDFKYCIND  |
| VDR_halibut    |         | KVIGFAKMI PGFRDLTAEDQIALLKSSA | <b>IEI</b>       | IMLRNQSFSLEDMSWSCGGPDFKYCIND  |
| VDR_fugu       |         | KVIGFAKMI PGFRELTAEDQIALLKSSA | <b>IEVIM</b>     | LRSNQSFNLEDMSWSCGGPDFKYRISD   |
| VDR_lamprey    |         | KVIGFAKMI PGFKELCTEDQISLLKASA | <b>IEI</b>       | ILRSNESFTMEDNSWTCGSNEFKYQIGD  |

|                |     | Helix-7       | Helix-8                                                                                    | Helix-9                        |
|----------------|-----|---------------|--------------------------------------------------------------------------------------------|--------------------------------|
|                |     | <b>B</b>      | <b>B B B BB B</b>                                                                          |                                |
|                |     | <b>B</b>      | <b>*#</b>                                                                                  | <b>B</b>                       |
| PXR_human      | 308 | LEDT-AGGF---- | QQLLLEP <b>ML</b> KFHYMLKKLQLH                                                             | EEEEYVLMQAI SLFSPDRPGVLQHRVV   |
| PXR_chimpanzee |     | LEDT-AGGF---- | QQLLLEP <b>ML</b> KFHYMLKKLQLH                                                             | EEEEYVLMQAI SLFSPDRPGVVQHRVV   |
| PXR_rhesus     |     | LEDP-AGGF---- | QQLLLEP <b>ML</b> KFHYMLKKLQLH                                                             | EEEEYVLMQAI SLFSPDRPGVVQHRVV   |
| PXR_dog        |     | LEDP-AGGF---- | QQLLLEP <b>V</b> LKFHYRLKRLQLH                                                             | KEEYVLMQAI SLFSPDRPGVVQRSVV    |
| PXR_pig        |     | LEDP-SGGF---- | QQLLL <b>Q</b> P <b>ML</b> KFHYMLKKLQLH                                                    | KEEYVLMQAI SLFSPDRPGVVQRQVV    |
| PXR_rabbit     |     | VEDP-EGGF---- | QQLLV <b>D</b> PL <b>L</b> KFHYMLKKLQLH                                                    | KEEYVLMQAI SLFSPDRPGVVQREVV    |
| PXR_mouse      |     | FEDP-NGGF---- | QKLLLD <b>PL</b> M <b>KF</b> HC <b>ML</b> KKLQLH                                           | KEEYVLMQAI SLFSPDRPGVVQRSVV    |
| PXR_rat        |     | FEDP-NGGF---- | QKLLLD <b>PL</b> M <b>KF</b> HC <b>ML</b> KKLQLR                                           | EEYVLMQAI SLFSPDRPGVVQRSVV     |
| PXR_chicken    |     | IKDGALAGF---- | QQI <b>Y</b> LE <b>PL</b> L <b>KF</b> HI <b>SL</b> KKLRL                                   | HEAEYVLLVAMLLFSPDHASVTQRDFI    |
| BXR-alpha      |     | TEDMFLAGF---- | RQLF <b>L</b> E <b>PL</b> V <b>R</b> I <b>H</b> R <b>M</b> M <b>R</b> KL                   | NLQSEYAMMAALSIFASDRPGVCDWEKI   |
| BXR-beta       |     | ADDMTMAGF---- | S <b>Q</b> Q <b>F</b> L <b>E</b> PL <b>L</b> R <b>I</b> H <b>C</b> M <b>M</b> T            | KLNLSEAYALMATMALFSSDRPGVSDCEKI |
| PXR_zebrafish  |     | MDDAFRAGF---- | QH <b>H</b> LL <b>D</b> PM <b>M</b> N <b>F</b> HY <b>T</b> LR <b>L</b> KL                  | RLHEEEYVLMQALSFLFSPDRPGVTDHKVI |
| PXR_fugu       |     | IEDAVRAGF---- | Q <b>P</b> L <b>F</b> L <b>E</b> PL <b>L</b> K <b>F</b> H <b>H</b> T <b>L</b> R <b>N</b> L | GLEEEYVLMQALSFLFSPDRPGVQQHSVI  |
| VDR_human      | 297 | VSDVTKAGH---- | S <b>L</b> E <b>L</b> I <b>E</b> PL <b>I</b> K <b>F</b> Q <b>V</b> GL <b>K</b> KL          | NLHEEEHVLLMAICIVSPDRPGVQDAALI  |
| VDR_tamarin    |     | ISDVTKAGH---- | N <b>L</b> E <b>L</b> I <b>E</b> PL <b>I</b> K <b>F</b> Q <b>V</b> GL <b>K</b> KL          | NLHEEEHVLLMAICIVSPDRPGVQDAALI  |
| VDR_mouse      |     | ITDVSRAGH---- | T <b>L</b> E <b>L</b> I <b>E</b> PL <b>I</b> K <b>F</b> Q <b>V</b> GL <b>K</b> KL          | NLHEEEHVLLMAICIVSPDRPGVQDAKL   |
| VDR_rat        |     | ITDVSRAGH---- | T <b>L</b> E <b>L</b> I <b>E</b> PL <b>I</b> K <b>F</b> Q <b>V</b> GL <b>K</b> KL          | NLHEEEHVLLMAICIVSPDRPGVQDAKL   |
| VDR_quail      |     | VTQ---AGH---- | S <b>M</b> D <b>L</b> L <b>E</b> PL <b>V</b> K <b>F</b> Q <b>V</b> GL <b>K</b> KL          | NLHEEEHVLLMAICILSPDRPGVQDTSLV  |
| VDR_chicken    |     | VTQ---AGH---- | S <b>M</b> D <b>L</b> L <b>E</b> PL <b>V</b> K <b>F</b> Q <b>V</b> GL <b>K</b> KL          | NLHEEEHVLLMAICILSPDRPGVQDTSLV  |
| VDR_xenopus    |     | VTQ---AGH---- | N <b>M</b> L <b>L</b> E <b>PL</b> V <b>K</b> F <b>Q</b> V <b>GL</b> K <b>L</b> D           | LHEEEHVLLMAICILSPDRPGLQDKALV   |
| VDR_zebrafish  |     | VTK---AGH---- | T <b>L</b> E <b>L</b> L <b>E</b> PL <b>V</b> K <b>F</b> Q <b>V</b> GL <b>K</b> KL          | LHEEEHVLLMAICLLSPDRPGVQDHVRI   |
| VDR_halibut    |     | VTK---AGH---- | T <b>L</b> E <b>L</b> L <b>E</b> PL <b>V</b> K <b>F</b> Q <b>V</b> GL <b>K</b> KL          | NLHEEEHVLLMGICLLSPDRPGVQDHARV  |
| VDR_fugu       |     | VTK---AGH---- | T <b>L</b> E <b>L</b> L <b>E</b> PL <b>V</b> K <b>F</b> Q <b>V</b> GL <b>K</b> KL          | NLQEEHVLLMAICLLSP---GTVDHARV   |
| VDR_lamprey    |     | VMQ---AGH---- | K <b>L</b> E <b>L</b> L <b>E</b> PL <b>V</b> K <b>F</b> Q <b>V</b> N <b>M</b> K <b>L</b> D | LHEAEHVLLMAICLFSPDRPGVQDRCRV   |

| Helix-9  | Helix-10           |
|----------|--------------------|
| <b>B</b> | <b>B B* B +B *</b> |

PXR\_human 363 DQLQEQFAITLKSYLECNR-PQPAHRFLFLKIMAMLTELRSLNAQHTQRLRLRIQDIHPFA  
PXR\_chimpanzee DQLQEKFAITLKSYLECNR-PQPAHRFLFLKIMAMLTELRSLNAQHTQRLRLRIQDIHPFA  
PXR\_rhesus DQLQEQYAITLKSYLECNR-PQPAHRFLFLKIMAMLTELRSLNAQHTQRLRLRIQDIHPFA  
PXR\_dog DQLQERFAIALKAYIECNR-PQPAHRFLFLKIMAMLTELRSLNAQHTQKLLRIQDIHPFA  
PXR\_pig DQLQERFAITLKAYIECNR-PQPAHRFLFLKIMAMLTELRSLNAQHTQRLRLRIQDIHPFA  
PXR\_rabbit DQLQERFAITLKAYIECSR-PQPTHFRFLFLKIMAVLTELRSLNAQHTQRLRLRIQDTHPFA  
PXR\_mouse DQLQERFALTLKAYIECSR-PYPAHRFLFLKIMAVLTELRSLNAQQTQQLLRIQDSHPFA  
PXR\_rat DQLQERFALTLKAYIECSR-PYPAHRFLFLKIMAVLTELRSLNAQQTQQLLRIQDTHPFA  
PXR\_chicken DQLQEKVALTLKSYIDHRH-PMPEGRFLYAKLLLLLTELQTLKMENTRQILHIQDLSSM-  
BXR-alpha QKLQEHIALTLKDFIDSQRPPSLQNRLLYPKIMECLTELRTVNDIHSKOLLEIWDIQPDA  
BXR-beta QNLQEHIALMLKAFIESHRPPSPQNRLLYPKIMECLTELRTINDIHSKOLLEIWDIQPDV  
PXR\_zebrafish DRNQETLALTLKTYIEAKR-NGPEKHLLFPKIMGCLTEMRSMNEEYTKQVLKIQDMQPEV  
PXR\_fugu DKIHENLALALKTRIELKR-TGPEKHMLYPKVLSCLTEMRTMNEEYTKQVLKIQDIQPNV  
VDR\_human 353 EAIQDRLSNTLQTYIRCRH-PPPGSHLLYAKMIQKLADLRSLNNEEHSKQYRCLSFQPECS  
VDR\_tamarin EAIQDRLSNTLQTYIRCRH-PPPGSHLLYAKMIQKLADLRSLNNEEHSKQYRCLSFQPESS  
VDR\_mouse EAIQDRLSNTLQTYIRCRH-PPPGSHQLYAKMIQKLADLRSLNNEEHSKQYRSLSFQPESS  
VDR\_rat EAIQDRLSNTLQTYIRCRH-PPPGSHQLYAKMIQKLADLRSLNNEEHSKQYRSLSFQPESS  
VDR\_quail ES IQDRLSDTLQTYIRCRH-PPPGSRLLYAKMIQKLADLRSLNNEEHSKQYRCLSFQPEHS  
VDR\_chicken ES IQDRLSDLIQTYIRCRH-PPPGSRLLYAKMIQKLADLRSLNNEEHSKQYRCLSFQPEHS  
VDR\_xenopus ES IQDRLSSTLQTYILCKH-PPPGSRLLYAKMIQKLADLRSLNNEEHSKQYRSISFLPEHS  
VDR\_zebrafish EALQDRLCDVLQAYIRIQH-P--GGRLLYAKMIQKLADLRSLNNEEHSKQYRSLSFQPEHS  
VDR\_halibut EQLQDRLEALQAYIRINH-P--GGRLLYAKMIQKLADLRSLNNEEHSKQYRSLSFQPEHS  
VDR\_fugu EALQDRLEALQAYIRLHH-P--GGRLLYAKMIQKLADLRSLNNEEHSKQYRSLSFQPEHS  
VDR\_lamprey EEVQEHLTETLRAYIACRH-PLSCKHMLYTKMVEKLTELRSLNNEEHSKQYLQISQDAVNK

Helix-AF

PXR\_human 421 ---TPLMQELFGITGS----  
PXR\_chimpanzee ---TPLMQELFGITGS----  
PXR\_rhesus ---TPLMQELFGITGS----  
PXR\_dog ---SPLMQELFSITDG----  
PXR\_pig ---TPLMQELFSITES----  
PXR\_rabbit ---TPLMRELFSTTDD----  
PXR\_mouse ---TPLMQELFSSTDG----  
PXR\_rat ---TPLMQELFSSTDG----  
PXR\_chicken ---TPLLSEIIS-----  
BXR-alpha ---TPLMREVFSGSPE-----  
BXR-beta ---TPLMREVFSGSLNE-----  
PXR\_zebrafish ---SPLWLEIISKDT-----  
PXR\_fugu ---IPPLLMEM-----  
VDR\_human 412 MKLTPLVLEVFGNEIS----  
VDR\_tamarin MKLTPLVLEVFGNEIS----  
VDR\_mouse MKLTPLVLEVFGNEIS----  
VDR\_rat MKLTPLVLEVFGNEIS----  
VDR\_quail MQLTPLVLEVFGNEIS----  
VDR\_chicken MQLTPLVLEVFGNEIS----  
VDR\_xenopus MKLTPLMLEVFSDEIP----  
VDR\_zebrafish MQLTPLVLEVFGSEVS----  
VDR\_halibut MQLTPLVLEVFGSEVS----  
VDR\_fugu MQLTPLVLEVFGSEVSPRLT  
VDR\_lamprey EDLPPLLELVFGNPTA----

**B.**

2 2 2 2 2 2 2 2 2 2 2 2 2 3 3 4 4 4  
0 0 0 4 4 4 4 5 8 8 8 8 9 2 2 0 1 2

|               |   |   |   |          |   |   |   |   |   |   |   |          |          |   |   |   |   |   |
|---------------|---|---|---|----------|---|---|---|---|---|---|---|----------|----------|---|---|---|---|---|
|               | 6 | 8 | 9 | 0        | 3 | 6 | 7 | 1 | 1 | 4 | 5 | 8        | 9        | 3 | 4 | 7 | 4 | 0 |
| PXR_human     | L | S | L | <b>L</b> | M | M | S | F | F | C | Q | <b>F</b> | <b>W</b> | M | L | H | I | F |
| PXR_chicken   | L | C | L | <b>L</b> | F | L | S | I | L | C | Q | <b>F</b> | <b>W</b> | L | L | N | I | M |
| BXR-alpha     | - | - | - | <b>L</b> | I | L | V | I | A | S | V | <b>F</b> | <b>W</b> | L | V | H | I | D |
| BXR-beta      | - | - | - | <b>L</b> | I | L | F | L | L | C | V | <b>F</b> | <b>W</b> | L | L | H | I | D |
| PXR_zebrafish | W | F | N | <b>L</b> | F | L | T | I | F | I | L | <b>F</b> | <b>W</b> | M | M | Y | I | E |

## LEGEND TO SUPPLEMENTARY FIGURE 1

### **Supplementary Figure 1. Alignment of the ligand-binding domains of PXR and VDR genes highlighting residues important in ligand binding for human PXR.** (A)

Alignment of the ligand-binding domains of PXR and VDR genes used in the phylogenetic analysis. Accession numbers for the genes are given in the Materials and Methods section. Numbering of genes and assignment of helices is according to Moore et al. (1). The symbols above the human PXR sequences indicate amino acid residues shown to interact directly with ligand in the two crystallographic structures of the human PXR ligand-binding domain complexed with the ligands SR12813 (2) or hyperforin (3): # indicates residues that interact with SR12813 only, + indicates a residue that interacts with hyperforin only, and \* indicates residues that interact with both SR12813 and hyperforin. (B) Alignment of human PXR, chicken PXR, frog BXR $\alpha$  and BXR $\beta$ , and zebrafish PXR sequences for the 18 amino acid residue positions in human PXR shown to interact directly with SR12813 and/or hyperforin. As can be seen, there is substantial diversity at these positions, consistent with the marked cross-species differences in ligands that activate these PXR. Only 6 of the 18 positions shown are conserved between human and zebrafish PXR and only 3 of 18 between human PXR and either BXR $\alpha$  or BXR $\beta$ . The numbers for each position are for human PXR.

### References for supplementary figure 1:

1. **Moore LB, Maglich JM, McKee DD, Wisely B, Willson TM, Kliewer SA, Lambert MH, Moore JT** 2002 Pregnane X receptor (PXR), constitutive androstane receptor (CAR), and benzoate X receptor (BXR) define three pharmacologically distinct classes of nuclear receptors. *Mol Endocrinol* 16:977-86
2. **Watkins RE, Wisely GB, Moore LB, Collins JL, Lambert MH, Williams SP, Willson TM, Kliewer SA, Redinbo MR** 2001 The human nuclear xenobiotic receptor PXR: structural determinants of directed promiscuity. *Science* 292:2329-33
3. **Watkins RE, Maglich JM, Moore LB, Wisely GB, Noble SM, Davis-Searles PR, Lambert MH, Kliewer SA, Redinbo MR** 2003 2.1 Å crystal structure of human PXR in complex with the St. John's wort compound hyperforin. *Biochemistry* 42:1430-8
