# Supplementary material
Source: PubMed Central journal article supplement (PMC2238640)
Supplement: NIHMS38425-supplement-Suppl__table_1.pdf [file NIHMS38425-supplement-Suppl__table_1.pdf]

**Supplementary Table Ia**Constructs used for transactivation assays and maximal activators of the PXR<sub>s</sub> and VDR<sub>s</sub>

| Receptor                                                | Expression vector | Amount transfected per well (ng reporter vector / ng expression construct) | Maximal activator (EC <sub>50</sub> , μM)                                                         | Maximal Fold Induction and Concentration Used |
|---------------------------------------------------------|-------------------|----------------------------------------------------------------------------|---------------------------------------------------------------------------------------------------|-----------------------------------------------|
| Human PXR                                               | Full-length       | 25 / 2.7                                                                   | Rifampicin (0.11 ± 0.013)                                                                         | 4.3 (10 μM)                                   |
| Human PXR ('SXR')                                       | GAL4/LBD chimera  | 125/83.3                                                                   | Rifampicin (0.52 ± 0.007)                                                                         | 11.6 (20 μM)                                  |
| Human VDR                                               | Full-length       | 30/3.5                                                                     | 1,25-(OH) <sub>2</sub> -vitamin D <sub>3</sub> (0.0019 ± 0.00013)                                 | 95.0 (1 μM)                                   |
| Mouse VDR                                               | Full-length       | 45/4.5                                                                     | 1,25-(OH) <sub>2</sub> -vitamin D <sub>3</sub> (0.00062 ± 0.00002)                                | 91.8 (0.01 μM)                                |
| Mouse PXR                                               | Full-length       | 25 / 2.7                                                                   | Pregnenolone 16α-carbonitrile (0.39 ± 0.09)                                                       | 2.5 (20 μM)                                   |
| Rat PXR                                                 | Full-length       | 25 / 2.7                                                                   | Pregnenolone 16α-carbonitrile (0.63 ± 0.13)                                                       | 6.2 (20 μM)                                   |
| Rabbit PXR                                              | Full-length       | 25 / 2.7                                                                   | 5β-Pregnane-3,20-dione (11.8 ± 2.4)                                                               | 15.5 (50 μM)                                  |
| Chicken PXR (=CXR)                                      | Full-length       | 10/1                                                                       | Nifedipine (0.73 ± 0.31)                                                                          | 2.7 (20 μM)                                   |
| Frog PXR (=BXR <sub>α</sub> ) ( <i>Xenopus laevis</i> ) | GAL4/LBD chimera  | 75/50                                                                      | <i>n</i> -Butyl- <i>p</i> -amino-benzoate (6.5 ± 1.1)                                             | 30.8 (30 μM)                                  |
| Frog PXR (=BXR <sub>β</sub> ) ( <i>Xenopus laevis</i> ) | GAL4/LBD chimera  | 75/50                                                                      | <i>n</i> -Propyl- <i>p</i> -hydroxy-benzoate (10.3 ± 1.3)                                         | 13.2 (50 μM)                                  |
| Zebrafish PXR                                           | GAL4/LBD chimera  | 75/50                                                                      | 5α-Androstan-3α-ol (4.6 ± 0.1)                                                                    | 17.6 (20 μM)                                  |
| Sea lamprey VDR                                         | Full-length       | 150/15 (no RXR);<br>150/15 + 15 ng zebrafish RXR <sub>β</sub> /well        | 1,25-(OH) <sub>2</sub> -vitamin D <sub>3</sub> (0.036 ± 0.01 without RXR; 0.024 ± 0.002 with RXR) | 23.9 without RXR; 137 with RXR (0.3 μM)       |

**Supplementary Table 1b**

Effects of bile salts, bile salt precursors, and benzoates on sea lamprey VDR

| Type of Bile Compound                                  | Species Which Produce the Bile Compound             | Common name                                                                                                                                                                                                                                   | Lamprey VDR EC <sub>50</sub> (µM)                                                                        | Lamprey VDR ε                        |
|--------------------------------------------------------|-----------------------------------------------------|-----------------------------------------------------------------------------------------------------------------------------------------------------------------------------------------------------------------------------------------------|----------------------------------------------------------------------------------------------------------|--------------------------------------|
| Bile salt precursor                                    | All species                                         | 7α-Hydroxycholesterol                                                                                                                                                                                                                         | No effect                                                                                                |                                      |
| <b>C<sub>24</sub> Bile alcohol, tetra-hydroxylated</b> | <b>Sea lamprey (<i>Petromyzon marinus</i>)</b>      | <b>5α-Petromyzonol<sup>a</sup></b><br><b>Petromyzonol 24-sulfate</b><br><b>3-Ketopetromyzonol</b><br><b>3-Ketopetromyzonol sulfate</b><br><b>3-Keto-7α,12α-dihydroxy-5α-cholelanic acid<sup>b</sup></b><br><b>5β-Petromyzonol<sup>b</sup></b> | <b>No effect</b><br><b>~ 1</b><br><b>No effect</b><br><b>~ 1</b><br><b>No effect</b><br><b>No effect</b> | <b>&lt; 0.06</b><br><b>&lt; 0.05</b> |
| C <sub>27</sub> bile alcohol, tri-hydroxylated         | Bile acid or bile alcohol precursor in many species | 5β-Cholestan-3α,7α,12α-triol                                                                                                                                                                                                                  | No effect                                                                                                |                                      |
| C <sub>27</sub> Bile alcohol, tetra-hydroxylated       | Hagfish ( <i>Myxine glutinosa</i> )                 | 5α-Myxinol <sup>c</sup><br>5α-Myxinol 3β, 27-disulfate                                                                                                                                                                                        | No effect<br>No effect                                                                                   |                                      |
| C <sub>27</sub> Bile alcohol, penta-hydroxylated       | Cypriniform fish (zebrafish, goldfish, carp)        | 5α-Cyprinol <sup>d</sup><br>5α-Cyprinol 27-sulfate                                                                                                                                                                                            | No effect<br>~ 20                                                                                        | < 0.06                               |
| C <sub>27</sub> Bile alcohol, hexa-hydroxylated        | Cartilaginous fish                                  | 5β-Scymnol <sup>e</sup><br>5β-Scymnol 27-sulfate                                                                                                                                                                                              | No effect<br>No effect                                                                                   |                                      |
| C <sub>27</sub> Bile acid                              | Alligator                                           | 3α,7α,12α-Trihydroxy-5β-Cholestan-27-oic acid, taurine conjugated                                                                                                                                                                             | No effect                                                                                                |                                      |
| C <sub>24</sub> Bile acid, primary                     | Chicken<br>Human                                    | Chenodeoxycholic acid<br>Glychenodeoxycholic acid<br>Taurochenodeoxycholic acid                                                                                                                                                               | No effect<br>No effect<br>No effect                                                                      |                                      |
| C <sub>24</sub> Bile acid, primary                     | Rat                                                 | α-Muricholic acid                                                                                                                                                                                                                             | No effect                                                                                                |                                      |
| C <sub>24</sub> Bile acid, primary                     | Mouse                                               | β-Muricholic acid<br>β-Muricholic acid - taurine conjugated<br>ω-Muricholic acid                                                                                                                                                              | No effect<br>No effect<br>No effect                                                                      |                                      |
| C <sub>24</sub> Bile acid, secondary                   | Mouse<br>Rat                                        | Murideoxycholic (murocholic) acid                                                                                                                                                                                                             | No effect                                                                                                |                                      |
| C <sub>24</sub> Bile acid, secondary                   | Rabbit<br>Human                                     | Deoxycholic acid<br>Glycodeoxycholic acid<br>Taurodeoxycholic acid<br>7-Ketodeoxycholic acid                                                                                                                                                  | No effect<br>No effect<br>No effect<br>No effect                                                         |                                      |
| C <sub>24</sub> Bile acid,                             | Human                                               | Cholic acid                                                                                                                                                                                                                                   | No effect                                                                                                |                                      |

|                                                                       |                 |                                                                                                                                                                                                                                                                                                                                                              |                                                                                                                                                          |  |
|-----------------------------------------------------------------------|-----------------|--------------------------------------------------------------------------------------------------------------------------------------------------------------------------------------------------------------------------------------------------------------------------------------------------------------------------------------------------------------|----------------------------------------------------------------------------------------------------------------------------------------------------------|--|
| primary                                                               |                 | Glycocholic acid<br>Taurocholic acid<br>Allocholic acid <sup>f</sup>                                                                                                                                                                                                                                                                                         | No effect<br>No effect<br>No effect                                                                                                                      |  |
| C <sub>24</sub> Bile acid,<br>primary                                 | Various mammals | Hyodeoxycholic acid<br>Taurohyodeoxycholic acid                                                                                                                                                                                                                                                                                                              | No effect<br>No effect                                                                                                                                   |  |
| C <sub>24</sub> Bile acid,<br>secondary and<br>metabolites<br>thereof | Human           | Lithocholic acid<br>Glycolithocholic acid<br>Taurolithocholic acid<br>7-Ketolithocholic acid<br>12-Ketolithocholic acid<br>7,12-Diketolithocholic acid<br>Lithocholic acid 3-sulfate<br>Glycolithocholic acid 3-sulfate<br>Taurolithocholic acid 3-sulfate<br>3-Ketolithocholic acid<br>Lithocholic acid acetate<br>Lithocholic acid acetate methyl<br>ester | No effect<br>No effect |  |
| Short-chain bile<br>acids                                             |                 | 23-Nordeoxycholic acid<br>23-Norcholic acid                                                                                                                                                                                                                                                                                                                  | No effect<br>No effect                                                                                                                                   |  |
| Benzoates                                                             |                 | 3-Aminoethylbenzoate<br><i>n</i> -Butyl- <i>p</i> -aminobenzoate<br><i>n</i> -Propyl- <i>p</i> -hydroxybenzoate                                                                                                                                                                                                                                              | No effect<br>No effect<br>No effect                                                                                                                      |  |

<sup>a</sup> 5 $\alpha$ -Cholan-3 $\alpha$ ,7 $\alpha$ ,12 $\alpha$ ,24-tetrol

<sup>b</sup> 3-Keto-7 $\alpha$ ,12 $\alpha$ -dihydroxy-5 $\alpha$ -cholic acid is the bile acid derivative of 3-ketopetromyzonol. 5 $\beta$ -Petromyzonol is studied for comparison to 5 $\alpha$ -petromyzonol.

<sup>c</sup> 5 $\alpha$ -Cholestan-3 $\beta$ ,7 $\alpha$ ,16 $\alpha$ ,27-tetrol

<sup>d</sup> 5 $\alpha$ -Cholestan-3 $\alpha$ ,7 $\alpha$ ,12 $\alpha$ ,26,27-pentol

<sup>e</sup> 5 $\beta$ -Cholestan-3 $\alpha$ ,7 $\alpha$ ,12 $\alpha$ ,24, 26,27-hexol

<sup>f</sup> Allocholic acid is 5 $\alpha$ -cholic acid and is studied for comparison to (5 $\beta$ -)cholic acid.

**Supplementary Table 1c***Effects of bile salts and bile salt precursors on frog BXR<sub>α</sub>s*

| Common name                                                                          | Importance                                                              | BXR <sub>α</sub><br>EC <sub>50</sub><br>(μM) | BXR <sub>α</sub><br>PXR<br>ε | BXR <sub>β</sub><br>EC <sub>50</sub><br>(μM) | BXR <sub>β</sub><br>PXR<br>ε |
|--------------------------------------------------------------------------------------|-------------------------------------------------------------------------|----------------------------------------------|------------------------------|----------------------------------------------|------------------------------|
| 7α-Hydroxycholesterol                                                                | Bile salt precursor                                                     | No effect                                    |                              | No effect                                    |                              |
| 5β-Cholestan-3α,7α,12α-triol                                                         | Bile acid and alcohol precursor                                         | No effect                                    |                              | No effect                                    |                              |
| 5β-Myxinol<br>5β-Myxinol-3β,27-disulfate                                             | Bile alcohol (hagfish)                                                  | No effect<br>No effect                       |                              | No effect<br>No effect                       |                              |
| <b>5α-Cyprinol</b><br><b>5α-Cyprinol sulfate<sup>a</sup></b>                         | <b>Bile alcohol (fish and frogs)</b>                                    | <b>No effect</b><br><b>No effect</b>         |                              | <b>No effect</b><br><b>No effect</b>         |                              |
| 5β-Scymnol<br>5β-Scymnol sulfate                                                     | Bile alcohol (cartilaginous fish)                                       | No effect<br>No effect                       |                              | No effect<br>No effect                       |                              |
| <b>3α,7α,12α-Trihydroxy-5β-Cholestan-27-oic acid, taurine conjugated<sup>a</sup></b> | <b>Long-chain bile acid from alligator (similar to frog bile acids)</b> | <b>No effect</b>                             |                              | <b>No effect</b>                             |                              |
| Deoxycholic acid                                                                     | Major biliary surfactant for rabbits                                    | No effect                                    |                              | No effect                                    |                              |
| Chenodeoxycholic acid                                                                | Major primary bile acid in birds and mammals                            | No effect                                    |                              | No effect                                    |                              |
| Cholic acid                                                                          | Major primary bile acid in birds and mammals                            | No effect                                    |                              | No effect                                    |                              |
| Lithocholic acid                                                                     | Toxic secondary bile acid in birds and mammals                          | No effect                                    |                              | No effect                                    |                              |
| Murideoxycholic acid                                                                 | Secondary bile                                                          | No effect                                    |                              | No effect                                    |                              |

|                                             | acid in mice and rats |           |                  |            |                  |
|---------------------------------------------|-----------------------|-----------|------------------|------------|------------------|
| <i>n</i> -Butyl- <i>p</i> -aminobenzoate    |                       | 6.5 ± 1.1 | 1.0 <sup>b</sup> |            |                  |
| <i>n</i> -Propyl- <i>p</i> -hydroxybenzoate |                       |           |                  | 10.3 ± 1.3 | 1.0 <sup>b</sup> |

<sup>a</sup> *Xenopus laevis* bile contains a mixture of bile alcohol sulfates and C<sub>27</sub> bile acids similar to these two compounds.

<sup>b</sup> Reference 'maximal activator' with  $\varepsilon = 1.0$ .
